# Supplementary material for: Cumulative 6-Year Risk of Screen-Detected Ductal Carcinoma In Situ by Screening Frequency
Source: PubMed Central journal article supplement (PMC9941892; doi:10.1001/jamanetworkopen.2023.0166), 2023-02-20
Supplement: jamanetwopen-e230166-s002.pdf [file jamanetwopen-e230166-s002.pdf]

## Data Sharing Statement

Sprague. Cumulative 6-Year Risk of Screen-Detected Ductal Carcinoma In Situ by Screening Frequency. *JAMA Netw Open*. Published February 20, 2023.

doi:10.1001/jamanetworkopen.2023.0166

### Data

**Data available:** Yes

**Data types:** Deidentified participant data

**How to access data:** Deidentified data underlying this manuscript is available, upon reasonable request and with appropriate regulatory approvals, from the Breast Cancer Surveillance Consortium Statistical Coordinating Center ([KPWA.scc@kp.org](mailto:KPWA.scc@kp.org)).

**When available:** With publication

### Supporting Documents

**Document types:** None

### Additional Information

**Who can access the data:** Researchers whose proposed use of the data has been approved.

**Types of analyses:** For non-commercial applications.

**Mechanisms of data availability:** With support to cover costs of data preparation and with appropriately regulatory approvals for data disclosure.
